# Supplementary material for: Incidence and Outcomes of SARS-CoV-2 Infection in Older Adults Living with Dementia: A Population-Based Cohort Study
Source: PubMed Central journal article supplement — J Alzheimers Dis. 2022 Sep 13;89(2):681–93. doi: 10.3233/JAD-220369 (PMC9535569; doi:10.3233/jad-220369), 2022-09-13
Supplement: jad-89-jad220369-s001.pdf [file jad-89-jad220369-s001.pdf]

# Supplementary Material

## Incidence and Outcomes of SARS-CoV-2 Infection in Older Adults Living with Dementia: A Population-Based Cohort Study

**Supplementary Table 1.** ICD-9-CM codes for cardiovascular risk factors and comorbidities, registered in the 24 months preceding the enrolment date

| <b>Cardiovascular risk factors</b>             | <b>ICD-9-CM codes</b>                                                         |
|------------------------------------------------|-------------------------------------------------------------------------------|
| Disorders of lipid metabolism                  | 272                                                                           |
| Hypertension                                   | 401-405                                                                       |
| Heart failure                                  | 428                                                                           |
| Ischemic heart disease^                        | 410-414, 429.7, V45.81, 36.1, V45.82, 00.66, 36.0                             |
| Arrhythmia                                     | 427                                                                           |
| Atrial fibrillation                            | 427.31                                                                        |
| Cerebrovascular diseases                       | 430-434, 436-438, 435, 00.61, 00.62, 38.01, 38.02, 38.11, 38.12, 38.31, 38.32 |
| Peripheral vascular disease                    | 440-445                                                                       |
| <b>Comorbidity</b>                             | <b>ICD-9-CM codes</b>                                                         |
| Diabetes                                       | 250                                                                           |
| Obesity                                        | 278                                                                           |
| COPD                                           | 491-492, 494, 496, 518.82, 518.83, 518.84                                     |
| Asthma                                         | 493                                                                           |
| Pneumonia                                      | 480-486                                                                       |
| Neoplasm                                       | 140-208                                                                       |
| Ulcerative colitis                             | 556.3, 556.5, 556.6, 556.9, 556.22                                            |
| Electrolytes and base-acid balance disorders   | 276                                                                           |
| Chronic kidney diseases                        | 584-586                                                                       |
| Gastric ulcer                                  | 531-534                                                                       |
| Parkinson's disease                            | 332                                                                           |
| Disease of the blood and blood-forming organs  | 280-289                                                                       |
| Chronic liver, pancreas. and intestine disease | 571, 572, 577.1-577.9                                                         |
| Fracture of neck femur                         | 820                                                                           |
| Anxiety                                        | 300                                                                           |
| Alcohol abuse                                  | 305                                                                           |
| Depression                                     | 296.20-296.26, 296.30-296.36                                                  |

**Supplementary Table 2.** ATC codes for drugs

| <b>Drugs</b>                             | <b>ATC codes</b>                                    |
|------------------------------------------|-----------------------------------------------------|
| Cardiac                                  | C01                                                 |
| Antihypertensive                         | C02,C03,C07,C08,C09                                 |
| Lipid modifying agents                   | C10                                                 |
| Statins                                  | C10AA                                               |
| Antiplatelet                             | A01AD05,B01AC06, N02BA01, B01AC04,B01AC05,<br>B01AB |
| Proton pump inhibitors                   | A02BC                                               |
| Insulin and analogues                    | A10A                                                |
| Blood glucose lowering drugs             | A10B                                                |
| Antidepressive drugs                     | N06A                                                |
| Antipsychotics, hypnotics, and sedatives | N05A                                                |
| Antithrombotic agents                    | B01                                                 |
| Antibacterial for systemic use           | J01                                                 |
| Endocrine therapy                        | L02                                                 |
| Analgesic drugs                          | N02                                                 |
| Immunostimulants drugs                   | L03                                                 |
| Acetylcholinesterase inhibitors          | N06DA01, N06DA02,N06DA03,N06DA04,N06DA05            |
| Memantine                                | N06DX01                                             |
